# Supplementary material for: The action of selective CRAC channel blockers is affected by the Orai pore geometry
Source: PubMed Central journal article supplement — Cell Calcium. 2013 Feb;53(2):139–51. doi: 10.1016/j.ceca.2012.11.005 (PMC3580291; doi:10.1016/j.ceca.2012.11.005), 2013-02
Supplement: mmc1.pdf [file mmc1.pdf]

**Supplemental Table 1** – Selectivity profile of GSK-7975A against a variety of over-expressed ion channel proteins tested for antagonistic (left panel) and agonistic (right panel) action.

| <b>Target</b>    | <b>Species</b> | <b>Activity (IC<sub>50</sub>)</b> |
|------------------|----------------|-----------------------------------|
| 5HT <sub>3</sub> | Human          | >10 μM                            |
| CaV1.2 (L-type)  | Human          | 8 μM                              |
| CaV3.2 (T-type)  | Human          | >10 μM                            |
| GABA-A           | Human          | >10 μM                            |
| KCNH2 (hERG)     | Human          | >10 μM                            |
| Kv1.3            | Human          | >10 μM                            |
| Kv1.5            | Human          | >10 μM                            |
| NaV1.5           | Human          | >10 μM                            |
| NaV1.7           | Human          | >10 μM                            |
| P2X7             | Human          | >10 μM                            |
| P2X7             | Rat            | >10 μM                            |
| TRPA1            | Human          | >10 μM                            |
| TRPC3            | Human          | >10 μM                            |
| TRPC6            | Human          | >10 μM                            |
| TRPV4            | Human          | >10 μM                            |
| TRPV4            | Rat            | >10 μM                            |

| <b>Target</b>    | <b>Species</b> | <b>Activity (EC<sub>50</sub>)</b> |
|------------------|----------------|-----------------------------------|
| 5HT <sub>3</sub> | Human          | >10 μM                            |
| GABA-A           | Human          | >10 μM                            |
| Kv3.1            | Human          | >10 μM                            |
| Kv7.2            | Human          | >10 μM                            |
| Kv7.3            | Human          | >10 μM                            |
| TRPA1            | Human          | >10 μM                            |
| TRPC3            | Human          | >10 μM                            |
| TRPC6            | Human          | >10 μM                            |
| TRPV4            | Human          | >10 μM                            |
| TRPV4            | Rat            | >10 μM                            |
